# Supplementary material for: Determinants of Antenatal Care Service Satisfaction among Women in Ethiopia: A Systematic Review and Meta-Analysis
Source: Obstet Gynecol Int. 2022 Mar 4;2022:9527576. doi: 10.1155/2022/9527576 (PMC8916880; doi:10.1155/2022/9527576)
Supplement: Supplementary Materials — Additional file 1: a supplementary file. It contains different search strategies used for searching of an articles in databases and gray literature. Additional file 2: report of risk of bias assessment of articles included in the meta-analysis. Additional file 3: report of sensitivity analysis of factors with high heterogeneity . [file 9527576.f1.zip]

Archive with 3 entries (3 files):
- 9527576.f1/additional file 2.docx
- 9527576.f1/additional file 3SA. sensitivity analysis.docx
- 9527576.f1/additional file1.docx
